# Supplementary material
Source: PubMed Central journal article supplement (PMC7657992)

## Electronic Supplementary Material

### Tissue-specific Nrf2 signaling protects against methylmercury toxicity in *Drosophila* development.

Gunderson et al.

**Online Resource 2. Table S1.** *Drosophila* strains, purpose, and source. Stocks obtained from the Bloomington *Drosophila* Stock Center (BDSC) includes the corresponding catalog number.

| Strain Name                                 | Purpose                                                                                                                         | Source                                                 |
|---------------------------------------------|---------------------------------------------------------------------------------------------------------------------------------|--------------------------------------------------------|
| Canton S (CS)                               | Wild-type strain                                                                                                                | BDSC #1                                                |
| w[1118]                                     | Genotype control for UAS lines                                                                                                  | BDSC #5905                                             |
| Mef2-GAL4                                   | Pan-muscle (Myocyte enhancer factor 2 (Mef2) promoter) expression of GAL4                                                       | BDSC #27390                                            |
| MHC-RFP-GAL4                                | Differentiated muscle (Myosin Heavy Chain (MHC) promoter) expression of GAL4 recombined with a UAS-RFP reporter                 | BDSC #38464                                            |
| Elav(I)-GAL4                                | Pan-neural expression of GAL4 (X chromosome)                                                                                    | BDSC #458                                              |
| Elav(III)-GAL4                              | Pan-neural expression of GAL4 (III chromosome)                                                                                  | BDSC #8760                                             |
| OK371-GAL4                                  | Glutamatergic neuron expression of GAL4. All <i>Drosophila</i> motor neurons are glutamatergic neurons.                         | BDSC #26160                                            |
| OK371mCherry-GAL4, MHC-GFP                  | Glutamatergic neuron GAL4 expression together with GFP reporter under control of MHC promoter                                   | BDSC #79600                                            |
| UAS-RFP-NLS                                 | RFP reporter with nuclear localization signal (NLS) under control of GAL4 responsive upstream activating sequence (UAS)         | BDSC #38424                                            |
| UAS-GFP-CD8                                 | GFP reporter (membrane localized) with cytosolic expression under control of GAL4 responsive upstream activating sequence (UAS) | BDSC #5130                                             |
| ARE-GFP-NLS                                 | Reporter for Antioxidant Response Element (ARE) expressing GFP with a nuclear localization signal (NLS)                         | Gifted from Dirk Bohmann (Chatterjee and Bohmann 2012) |
| ARE-GFP; Mef2-GAL4, Tub-GAL80 <sup>TS</sup> | Temperature sensitive GAL80 controlled pan-muscle GAL4 expression combined with ARE-GFP reporter                                | Gifted from Dirk Bohmann                               |
| UAS-CncC                                    | CncC expression under control of GAL4 responsive upstream activating sequence (UAS)                                             | Gifted from Dirk Bohmann (Sykiotis and Bohmann 2008)   |
| UAS-CncC <sup>RNAi</sup>                    | Hairpin RNAi knockdown of CncC expression under control of GAL4 responsive upstream activating sequence (UAS)                   | Gifted from Dirk Bohmann                               |

|                                 |                                                                                                                  |                                                            |
|---------------------------------|------------------------------------------------------------------------------------------------------------------|------------------------------------------------------------|
|                                 |                                                                                                                  | (Sykiotis and Bohmann 2008)                                |
| <b>UAS-Keap1</b>                | Keap1 under control of GAL4 responsive upstream activating sequence (UAS)                                        | Gifted from Dirk Bohmann (Sykiotis and Bohmann 2008)       |
| <b>UAS-Keap1<sup>RNAi</sup></b> | Hairpin RNAi knockdown of Keap1 expression under control of GAL4 responsive upstream activating sequence (UAS)   | Gifted from Dirk Bohmann (Sykiotis and Bohmann 2008)       |
| <b>Cnc-T2A-GAL4</b>             | GAL4 expression under control of endogenous Cnc gene promoter/enhancer. Abbreviated Cnc-GAL4 in the text.        | Gifted from Dirk Bohmann<br><br>Created in Hugo Bellen lab |
| <b>Mef2-RFP-GAL4</b>            | Pan-muscle GAL4 expression together with UAS-RFP reporter expression                                             | This study                                                 |
| <b>Cnc-RFP-GAL4</b>             | GAL4 expression under control of endogenous Cnc gene promoter/enhancer together with UAS-RFP reporter expression | This study                                                 |

**Online Resource 3.** RT-qPCR forward and reverse primer sequences.

| <b>Gene</b>  | <b>Forward<br/>(5' → 3')</b> | <b>Reverse<br/>(5' → 3')</b>   |
|--------------|------------------------------|--------------------------------|
| <i>RP49</i>  | AGT ATC TGA TGC CCA ACA TCG  | TTC CGA CCA GGT TAC AAG AAC    |
| <i>CncC</i>  | GAT ACC GCC TCG CTG GAC CC   | GAT CCT GCA GCG CAT GTG GC     |
| <i>Keap1</i> | TGG CCA GCG TGG AGT GCT AC   | TTG CAG CAA CAC CCG CTC CA     |
| <i>Ho</i>    | ACC ATT TGC CCG CCG GGA TG   | AGT GCG ACG GCC AGC TTC CT     |
| <i>Gclc</i>  | ATG ACG AGG AGA ATG AGC TG   | CCA TGG ACT GCA AAT AGC TG     |
| <i>dMRP</i>  | CCA GTC GCA TCA AGA CCT ATC  | GCG TAC AAT TTG AGC ACC TTA AT |

**Online Resource 4.** Representative images of ARE-GFP-NLS DIOMs used for quantification of nuclei fluorescence intensity upon MeHg exposure. A single region of interest containing at least 100 nuclei primarily from A1-A5 most medial DIOMs (indicated by white asterisks in 0  $\mu$ M MeHg abdomen) was used for quantification purposes.

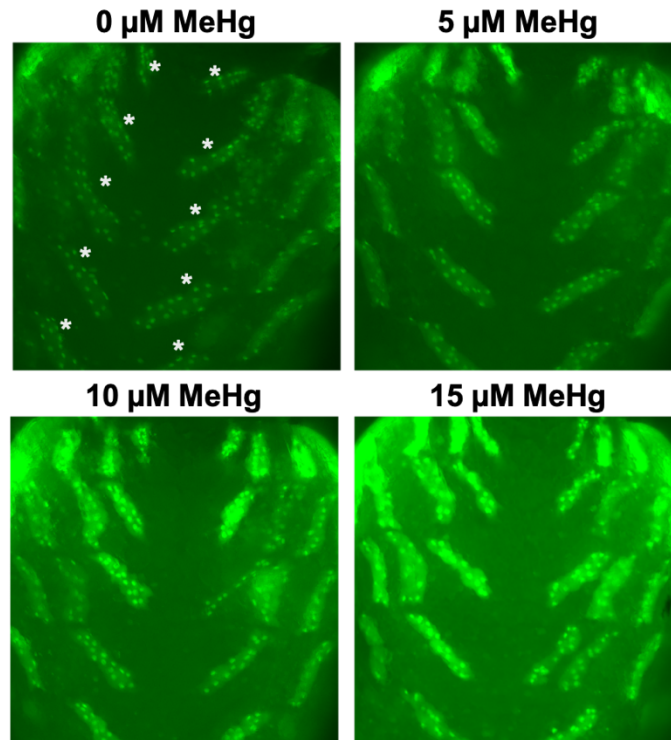

**Online Resource 5.** Keap1 expression level influences DIOMs remodeling success upon MeHg treatment. **a** Representative images of p7 DIOMs morphology with either no change, knockdown, or overexpression of Keap1 in conjunction with larval exposure to MeHg. Number of myospheres originating from the most medial DIOMs in the A2-A5 abdominal segments (indicated by white asterisks) were quantified to assess the influence of Keap1 expression on DIOMs remodeling upon exposure to various MeHg concentrations: **(b)** 0  $\mu\text{M}$ , **(c)** 5  $\mu\text{M}$ , and **(d)** 10  $\mu\text{M}$ . **b-d**  $n \geq 10$  abdomens/genotype/treatment, mean  $\pm$  s.d.m., Kruskal-Wallis test with Dunn's post-hoc for multiple comparisons,  $p < 0.05$ , data not connected by the same letter are significantly different.

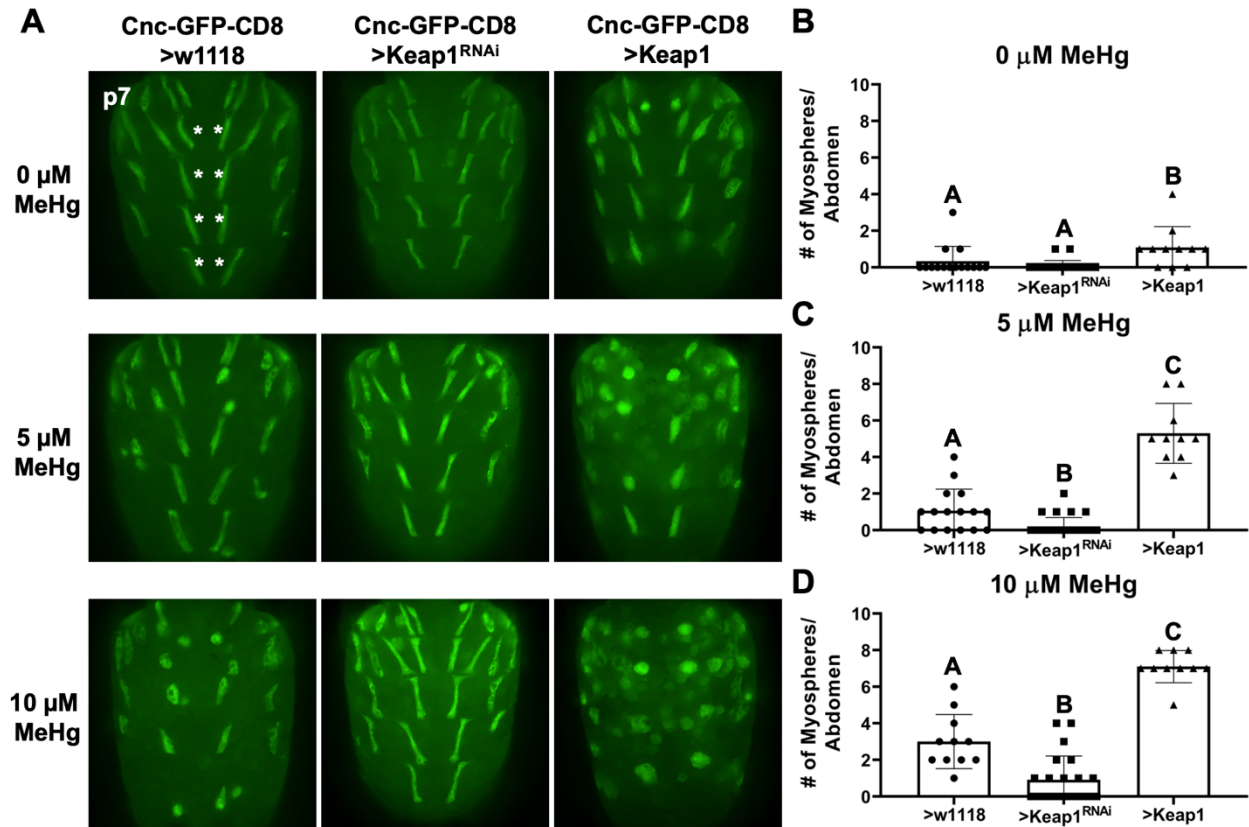

Supplement: NIHMS1622313-supplement-204_2020_2879_MOESM3_ESM.pdf [file NIHMS1622313-supplement-204_2020_2879_MOESM3_ESM.pdf]
