# Supplementary material
Source: PubMed Central journal article supplement (PMC7657992)
Supplement: NIHMS1622313-supplement-204_2020_2879_MOESM1_ESM.pdf [file NIHMS1622313-supplement-204_2020_2879_MOESM1_ESM.pdf]

## Electronic Supplementary Material

### Tissue-specific Nrf2 signaling protects against methylmercury toxicity in *Drosophila* neuromuscular development.

Gunderson et al.

**Online Resource 1. Movie S1.** Time lapse imaging of ARE-GFP-NLS pupa during the first 48 hours of metamorphosis. Pupae were live imaged on a Nikon AZ100 Multizoom microscope (MVI, Avon MA). Images were collected at a frame rate of 15 minutes for a period of 48 hours spanning 0h APF to 48h APF. Green fluorescence is detected in nuclei where endogenous ARE activation is occurring. The act of head eversion is seen to be complete at 12 hours. The distinct linear array of larval template myotubes in the thorax are seen to express GFP transiently, prior to development of the dorsal indirect flight muscles (IFMs). In the abdomen, green fluorescence is seen to intensify in the nuclei of the DIOM muscles. Fluorescence is seen to persist as the medial-most DIOM muscles assume their near anterior-posterior alignment and nuclei align along their longitudinal axis.
